# Supplementary material
Source: PubMed Central journal article supplement (PMC5984560)
Supplement: Supp_Fig1.pdf [file Supp_Fig1.pdf]

## Supplementary Data

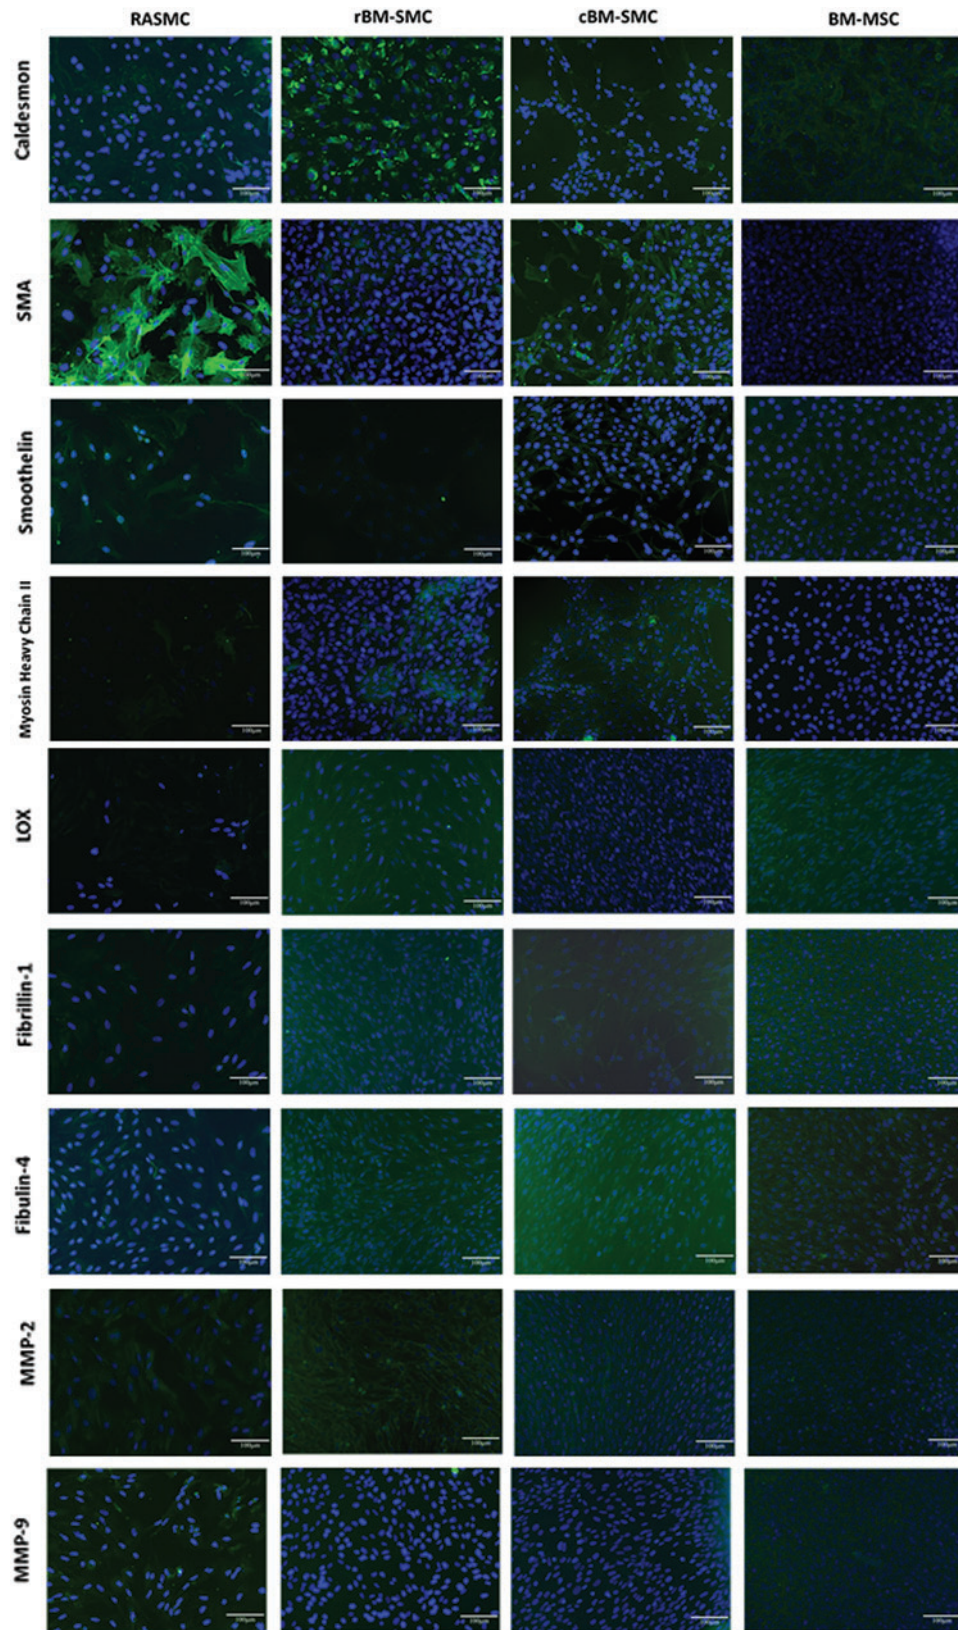

**SUPPLEMENTARY FIG. S1.** Comparative expression of SMC marker proteins and key elastic fiber assembly proteins by derived and control cell types using immunofluorescence. Expression trends conform to that deemed by Western blot analysis. SMCs, smooth muscle cells.
